# Supplementary material
Source: MDPI journal article supplement (https://www.mdpi.com/2313-433X/7/9/181)
Supplement: s1 [file s1]

SUPPLEMENTARY MATERIALS

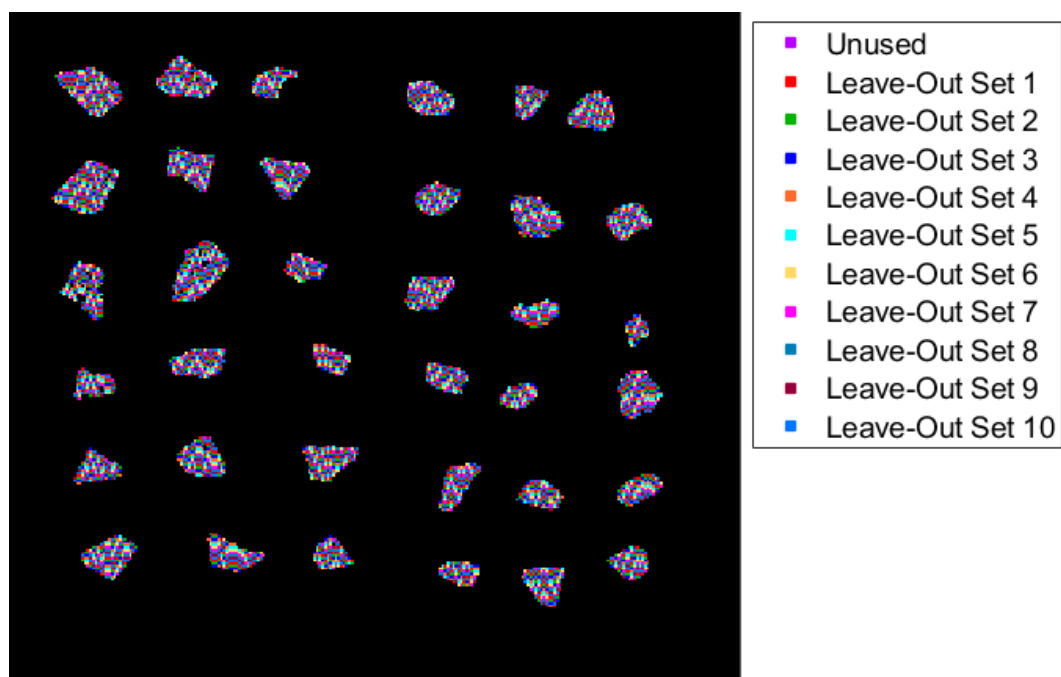

**Figure S1.** Venetian blind (number of data splits= 10) as cross-validation method on calibration dataset.
